# Supplementary material for: Enhanced doxorubicin transport to multidrug resistant breast cancer cells via TiO2 nanocarriers
Source: Royal Society of Chemistry journal article supplement (doi:10.1039/c3ra42863j), 2013-01-01
Supplement: c3ra42863j.pdf [file c3ra42863j.pdf]

# Enhanced Doxorubicin Transport to Multidrug Resistant Breast Cancer Cells via TiO<sub>2</sub> Nanocarriers

Wenzhi Ren<sup>a</sup>, Leyong Zeng<sup>a</sup>, Zheyu Shen<sup>a</sup>, Lingchao Xiang<sup>a</sup>, An Gong<sup>a</sup>, Jichao Zhang<sup>b</sup>,  
Chengwen Mao<sup>b</sup>, Aiguo Li<sup>b</sup>, Tatjana Paunesku<sup>c</sup>, Gayle E. Woloschak<sup>c</sup>, Narayan S. Hosmane<sup>d</sup>,  
Aiguo Wu<sup>a\*</sup>

\*Corresponding Author. Aiguo Wu

Tel.: +86 574 86685039, fax: +86 574 86685163, E-mail address: [aiguo@nimte.ac.cn](mailto:aiguo@nimte.ac.cn)

## 1. TEM images of as-prepared TiO<sub>2</sub> nanoparticles

**Figure S 1A** showed that the size of TiO<sub>2</sub> without heat treatment was 3-6 nm, but the yield was very low. The TiO<sub>2</sub> with 3-6 nm diameter was then heated in a vessel at 200°C for 10 hours. Size of TiO<sub>2</sub> with heat treatment was 20-30 nm, and the yield was enhanced as shown in **Figure S 1B**. The TiO<sub>2</sub> with heat treatment was used as nanocarriers in this study. **Figure S 1C** showed the high resolution TEM and selected area electron diffraction of the nanocarriers. **Figure S 1D** showed that the size of TiO<sub>2</sub>/DOX was also 20-30 nm.

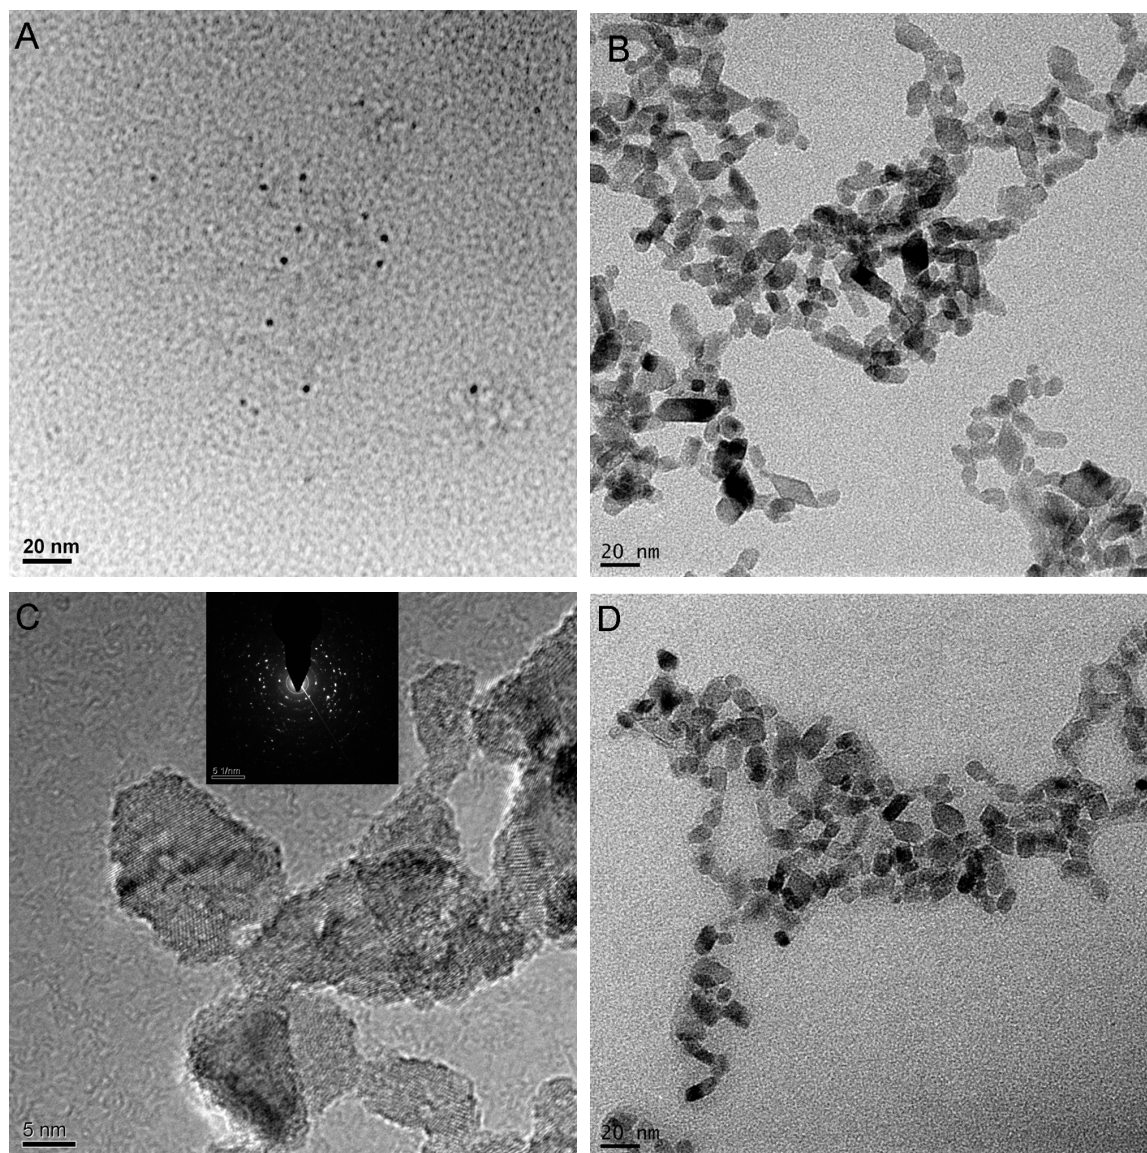

**Figure S1** TEM images of TiO<sub>2</sub>. TiO<sub>2</sub> without heat treatment (**A**), TiO<sub>2</sub> nanocarriers with heat treatment (**B**), high resolution TEM and selected area electron diffraction of TiO<sub>2</sub> (**C**), and TiO<sub>2</sub>/DOX (**D**).

## 2. XRD of TiO<sub>2</sub> nanoparticles

**Figure S 2A** showed that crystallinity of TiO<sub>2</sub> without heat treatment was not good.

**Figure S 2B** showed that crystallinity of TiO<sub>2</sub> with heat treatment was better.

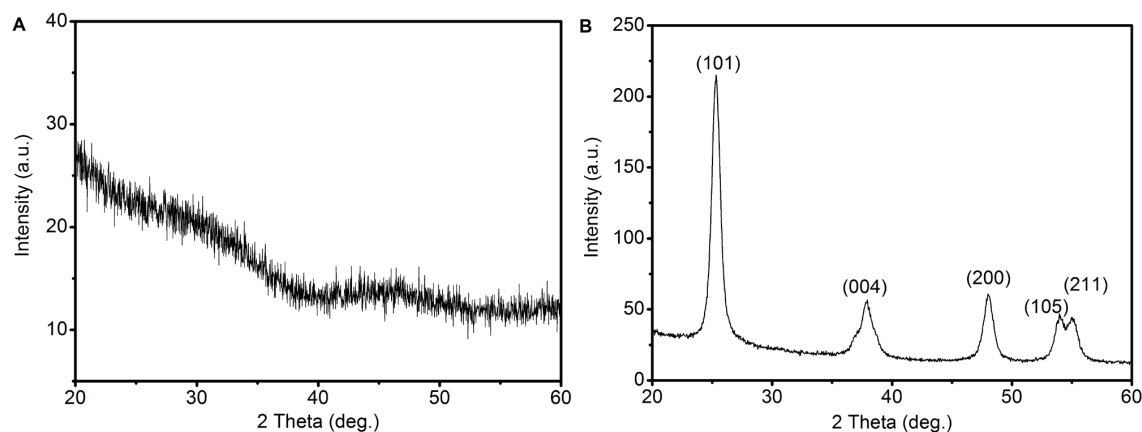

**Figure S2** XRD of  $\text{TiO}_2$ .  $\text{TiO}_2$  without heat treatment (**A**),  $\text{TiO}_2$  nanocarriers with heat treatment (**B**).

### 3. Size distributions of $\text{TiO}_2$ or $\text{TiO}_2/\text{DOX}$ for long time storage

**Figure S 3** showed that size of  $\text{TiO}_2$  nanocarriers (**Figure S 3A**) or  $\text{TiO}_2/\text{DOX}$  (**Figure S 3B**) could grow up slowly as time went on from 1 to 25 week(s).

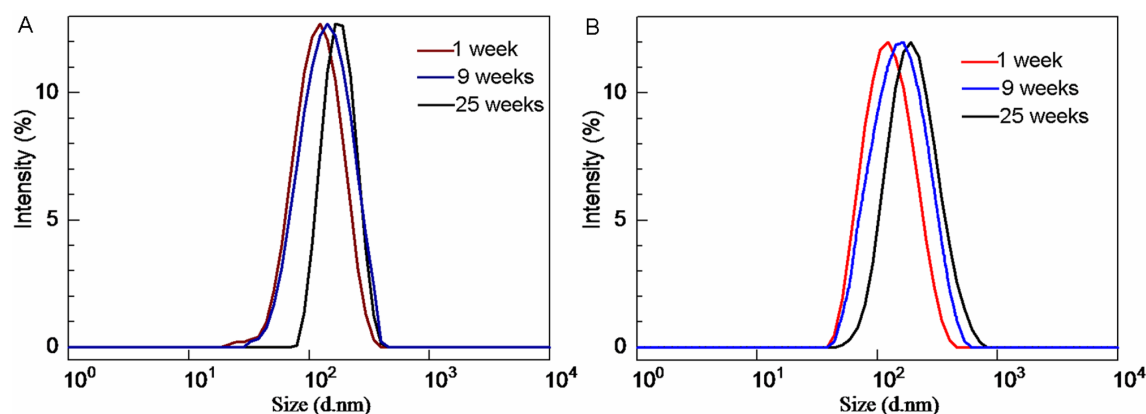

**Figure S3** Size distribution of  $\text{TiO}_2$  nanocarriers (**A**) and  $\text{TiO}_2/\text{DOX}$  (**B**) with different storage time.

### 4. Loading efficiency of DOX onto $\text{TiO}_2$ surface

In the first time to prepare  $\text{TiO}_2/\text{DOX}$  nanocomposites, 20mL DOX (0.5 mM) were drop-wise added into 5 mL  $\text{TiO}_2$  (75mM) colloidal solution and stirred for 24 h. After stirring, the solution was centrifuged, and free DOX was collected (25mL). As shown in **Figure S 4A**, line 1 to 6 were absorptions of DOX at different concentration gradients from 0.25 to 0.0036

mM. **Figure S 4B** showed concentration-absorption curve of DOX which was calculated through absorptions of line 1 to 6. In **Figure S4C**, black line named “Supernatant-1” was absorption of the collected free DOX mentioned above. According to the cure of DOX, concentration of free DOX was 0.235 mM. Therefore, loading efficiency of DOX onto TiO<sub>2</sub> surface =  $(0.5 \text{ mM} \times 20 \text{ mL} - 0.235 \text{ mM} \times 25 \text{ mL}) \div (75 \text{ mM} \times 5 \text{ mL}) \times 100\%$ , and the loading efficiency was 1.1%. In our manuscript, in order to keep stable of TiO<sub>2</sub>/DOX, half amount of loaded DOX was used to prepare TiO<sub>2</sub>/DOX in the following experiments. Briefly, 20mL DOX (0.103 mM) were stirred with 5 mL TiO<sub>2</sub> (75mM) for 24 h. After stirring, the solution was centrifuged; supernatant liquid was collected and characterized by UV-Visible spectra. As shown in **Figure S4 C**, it was difficult to measure the peak of free DOX from the red line named “Supernatant-2” which was absorption of the supernatant liquid mentioned above. Therefore, the DOX was loaded by TiO<sub>2</sub> completely, and the loading efficiency =  $(0.103 \text{ mM} \times 20 \text{ mL}) \div (75 \text{ mM} \times 5 \text{ mL}) \times 100\% = 0.55\%$ .

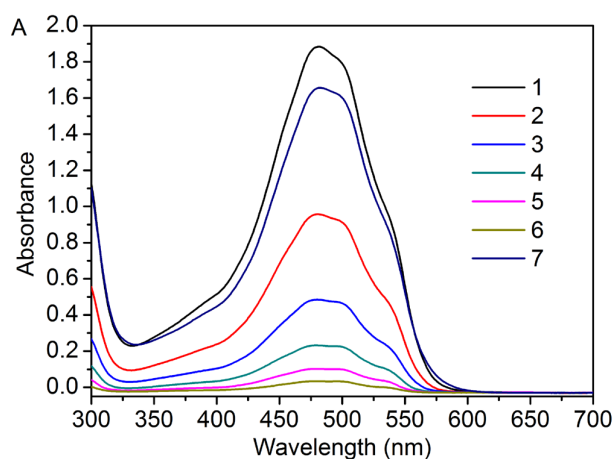

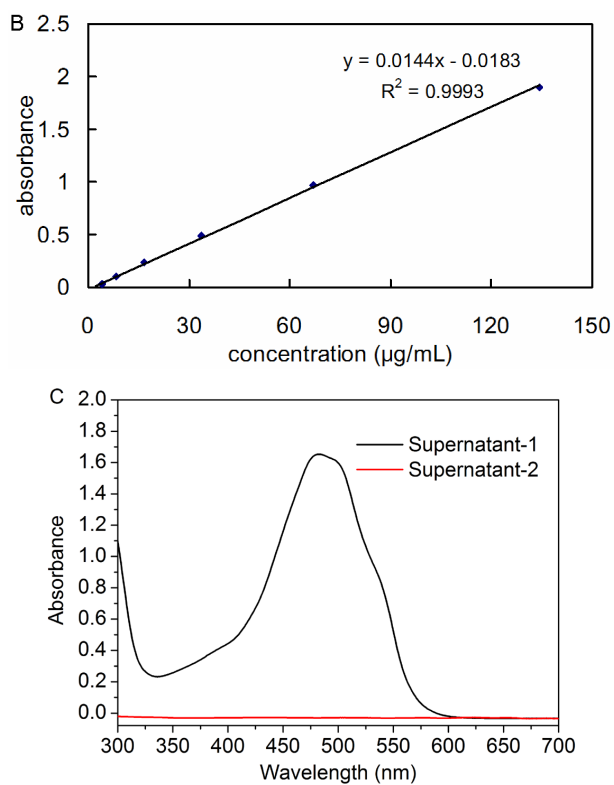

**Figure S4** UV-Visible absorption of DOX at different concentration (A), concentration - absorbance curve of DOX (B), and UV-Visible absorption of collected supernatant liquid after centrifugation(C).
